# Supplementary material for: Hydrogen titanate nanosheet-assembled fibers as a new matrix to promote the Co-activated PMS process for efficient polychlorinated phenol degradation
Source: Royal Society of Chemistry journal article supplement (doi:10.1039/d3qm00344b), 2023-01-01
Supplement: d3qm00344b1.pdf [file d3qm00344b1.pdf]

## Supporting Information

### **Hydrogen titanate nanosheets-assembled fiber as a new matrix to promote Co-activated PMS process for efficient polychlorinated phenols degradation**

Qiaoqiao Ding<sup>#</sup>, Mang Niu<sup>#</sup>, Hong Su<sup>\*</sup>, Zhanyin Liu, Jianfei Gao, Yanhui Zhao, Chunlei Liu, Yuan Liu<sup>\*</sup>, Chunzhao Liu<sup>\*</sup>

*State Key Laboratory of Bio-fibers and Eco-textiles, Institute of Biochemical Engineering, Affiliated Qingdao Central Hospital, College of Materials Science and Engineering, Qingdao University, Qingdao 266071, China.*

\*Corresponding author.

*E-mail:* su13963924681@163.com (H. Su); liuyuan@qdu.edu.cn (Y. Liu); czliu@qdu.edu.cn (C. Liu)

<sup>#</sup>These authors contributed equally to this paper.

## S1 Calculation method

The DFT calculations were carried out using the Vienna Ab-initio Simulation Package (VASP)<sup>S1, 2</sup> with the frozen-core all-electron projector-augment-wave (PAW)<sup>S3, 4</sup> method. The Perdew-Burke-Ernzerhof (PBE)<sup>S5</sup> of generalized gradient approximation (GGA) was adopted to describe the exchange and correlation potential. The cutoff energy for the plane-wave basis set was set to 450 eV. The 2-layer Co<sub>3</sub>O<sub>4</sub>(311) slab, 3-layer TiO<sub>2</sub>(101) slab, mono-layer HTO(101) slab were used. A vacuum region of 20 Å was added above these supercell models to minimize the interactions between neighboring systems. A Co<sub>9</sub>O<sub>12</sub> cluster was placed on HTO(101) slab to built Co<sub>3</sub>O<sub>4</sub>/HTO composite. The geometry optimizations were performed until the forces on each ion was reduced below 0.01 eV/Å. The Gamma k-point<sup>S6</sup> sampling was used. The van der Waals (vdW) interactions have been considered by using DFT-D3 method of Grimme<sup>S7</sup>. The resulting structures were then used to calculate the electronic structures.

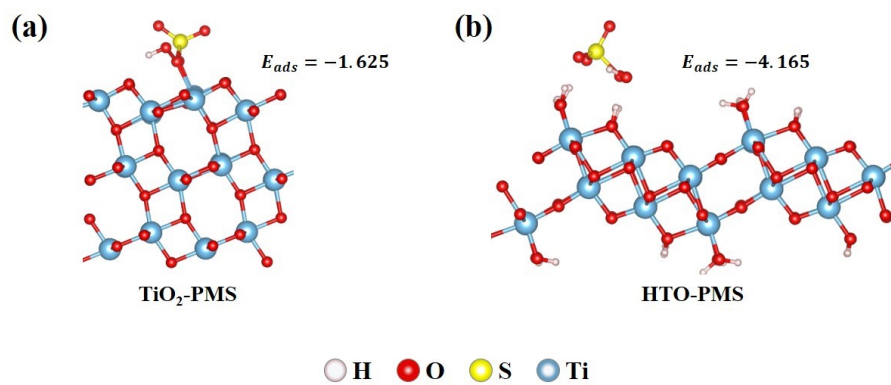

**Fig. S1.** The DFT optimized structures of PMS adsorption on (a) TiO<sub>2</sub>(101) surface and (b) HTO(100) surface.

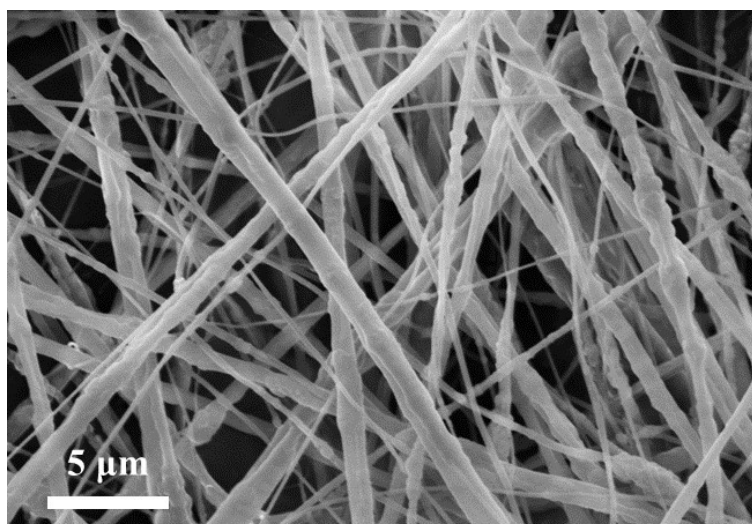

**Fig. S2.** SEM image of TiO<sub>2</sub>/SiO<sub>2</sub>/Co<sub>3</sub>O<sub>4</sub> fibers.

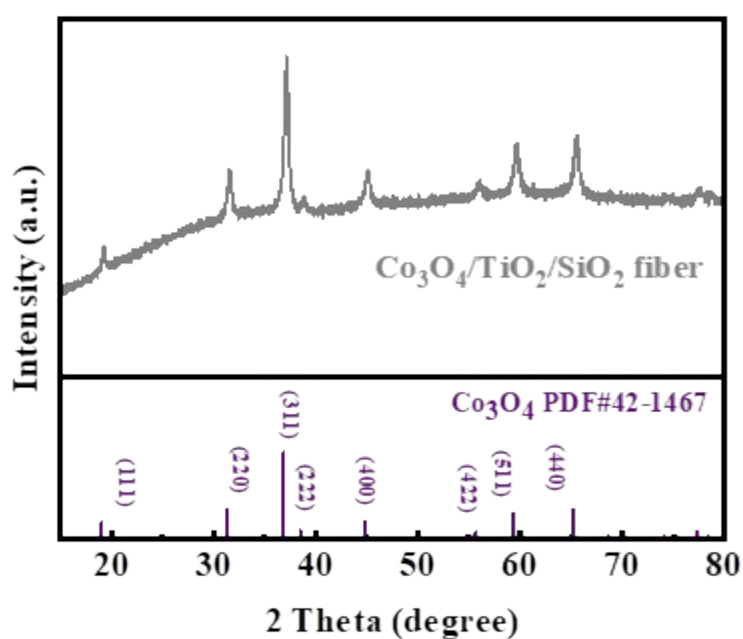

**Fig. S3.** XRD spectra of  $\text{TiO}_2/\text{SiO}_2/\text{Co}_3\text{O}_4$  fibers.

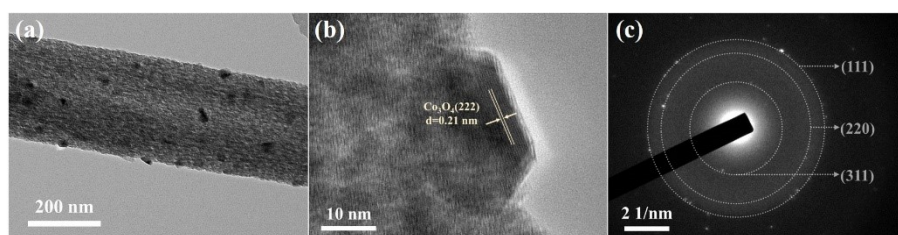

**Fig. S4.** (a) TEM, (b) HR-TEM, (c) SAED image of  $\text{TiO}_2/\text{SiO}_2/\text{Co}_3\text{O}_4$  fibers.

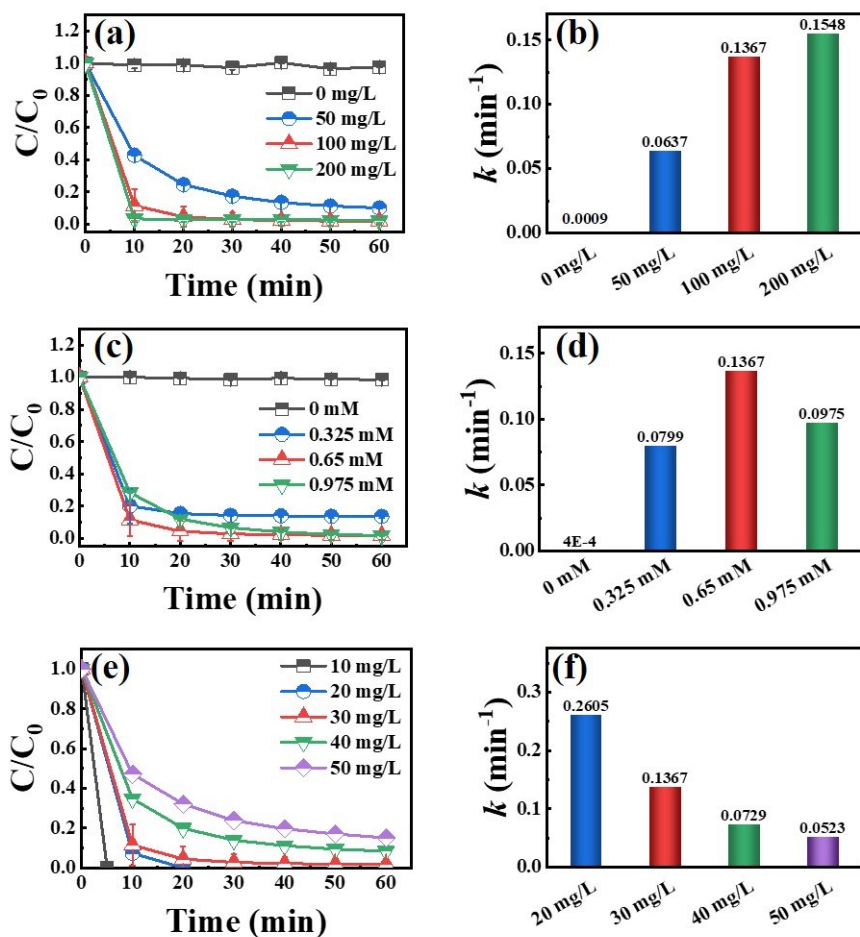

**Fig. S5.** Effect of the (a, b)  $\text{Co}_3\text{O}_4/\text{HTO}$  dosage, (c, d) PMS dosage, (e, f) 2,4-DCP concentration on the removal of 2,4-DCP. Conditions: [2,4-DCP]: 30 mg/L, [catalyst]: 100 mg/L, [PMS]: 0.65 mM, initial pH 5.9,  $T = 25\text{ }^\circ\text{C}$ , unless otherwise specified.

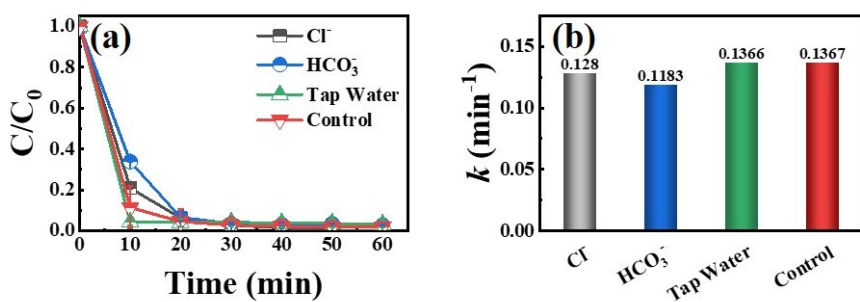

**Fig. S6.** Effect of coexisting anions on the removal of phenolic. Conditions: [phenolic]: [2,4-DCP]: 30 mg/L, [catalyst]: 100 mg/L, [PMS]: 0.65 mM, initial pH 5.9,  $T = 25\text{ }^\circ\text{C}$ , [ions] = 10 mM.

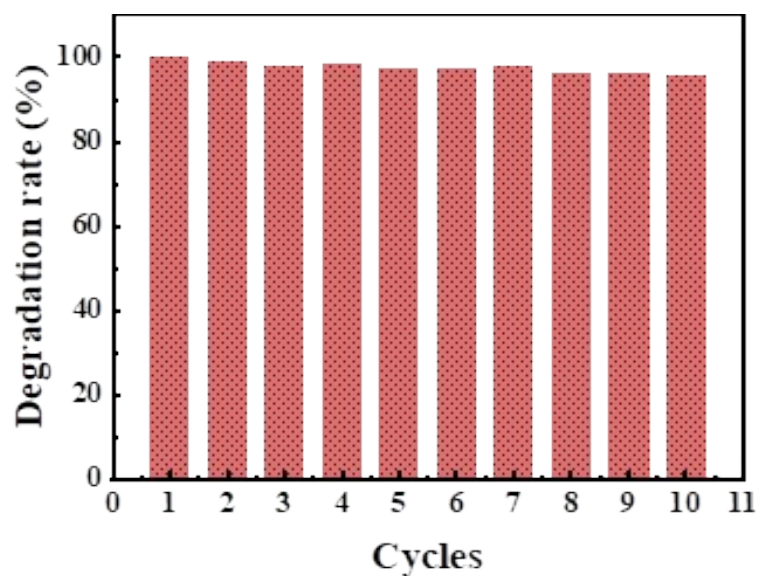

**Fig. S7.** Effect of the cycle on the removal of phenolic. Conditions: [phenolic]: 10 mg/L, [catalyst]: 100 mg/L, [PMS]: 0.65 mM, initial pH 5.9, T = 25 °C, t = 60 min.

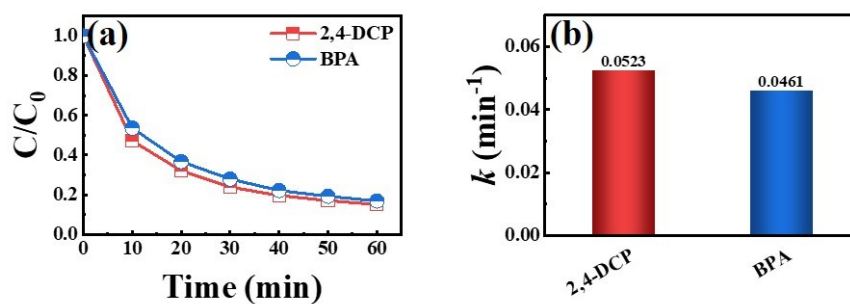

**Fig. S8.** Effect of the types on the removal of phenolic. Conditions: [phenolic]: 50 mg/L, [catalyst]: 100 mg/L, [PMS]: 0.65 mM, initial pH 5.9, T = 25 °C.

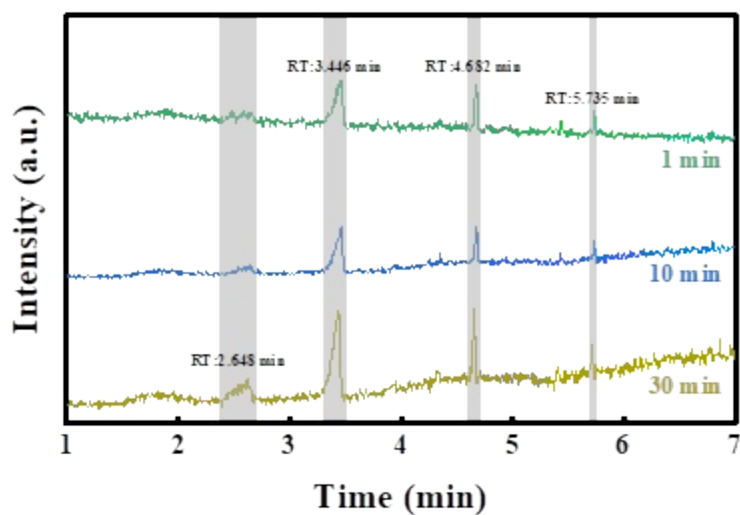

**Fig. S9.** GC chromatogram of the reaction products during the degradation of 2,4-DCP.

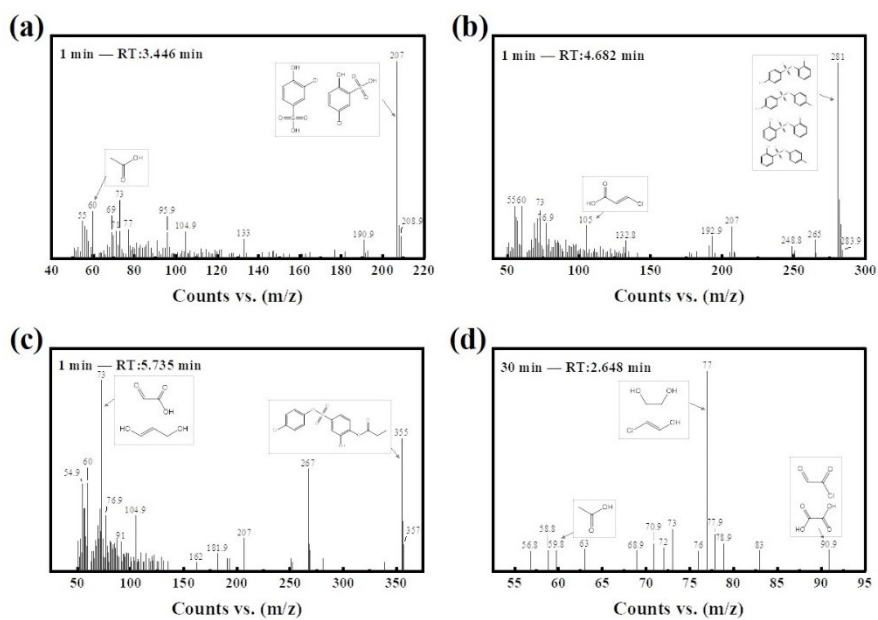

**Fig. S10.** Mass spectra of the solution samples recorded at 1 min of 2,4-DCP degradation.

**Table S1.** Degradation intermediate of 2,4-DCP detected by GC-MS.

| m/z | Molecular formula                                 | Chemical name                                            | Structural formula                                                                    |
|-----|---------------------------------------------------|----------------------------------------------------------|---------------------------------------------------------------------------------------|
| 162 | C <sub>6</sub> H <sub>4</sub> Cl <sub>2</sub> O   | 2,4-dichlorophenol                                       | 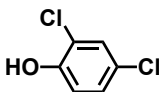   |
| 209 | C <sub>6</sub> H <sub>5</sub> SClO <sub>4</sub>   | 5-chloro-2-hydroxybenzenesulfonate                       |    |
|     |                                                   | 3-chloro-4-hydroxybenzenesulfonate                       |    |
| 284 | C <sub>12</sub> H <sub>9</sub> SClO <sub>4</sub>  | 2-chlorophenyl 4-hydroxybenzenesulfonate                 |    |
|     |                                                   | 4-chlorophenyl 4-hydroxybenzenesulfonate                 |    |
|     |                                                   | 2-chlorophenyl 2-hydroxybenzenesulfonate                 |   |
|     |                                                   | 4-chlorophenyl 2-hydroxybenzenesulfonate                 |  |
| 357 | C <sub>15</sub> H <sub>13</sub> SClO <sub>6</sub> | 4-((4-chlorophenoxy)sulfonyl)-2-hydroxyphenyl propionate |  |
| 105 | C <sub>3</sub> H <sub>3</sub> O <sub>2</sub> Cl   | (E)-3-chloroacrylic acid                                 |  |
| 91  | C <sub>2</sub> HO <sub>2</sub> Cl                 | 2-oxoacetyl chloride                                     |  |
|     | C <sub>2</sub> H <sub>2</sub> O <sub>6</sub>      | oxalic acid                                              |  |
| 77  | C <sub>2</sub> H <sub>2</sub> OCl                 | (E)-2-chloroethen-1-ol                                   |  |
| 73  | C <sub>2</sub> H <sub>2</sub> O <sub>3</sub>      | 2-oxoacetic acid                                         |  |
|     | C <sub>3</sub> H <sub>6</sub> O <sub>2</sub>      | (E)-prop-1-ene-1,3-diol                                  |  |



|    |             |                     |                                                                                     |
|----|-------------|---------------------|-------------------------------------------------------------------------------------|
| 63 | $C_2H_6O_2$ | ethane-1,2-diol     |  |
| 60 | $C_2H_4O_2$ | acetic acid         |  |
|    |             | (Z)-ethene-1,2-diol |  |

## References

1. G. Kresse and J. Hafner, Ab initio molecular-dynamics simulation of the liquid-metal--amorphous-semiconductor transition in germanium, *Phys. Rev. B*, 1994, **49**, 14251-14269.
2. G. Kresse and J. Furthmüller, Efficient iterative schemes for ab initio total-energy calculations using a plane-wave basis set, *Phys. Rev. B*, 1996, **54**, 11169-11186.
3. P. E. Blöchl, Projector augmented-wave method, *Phys. Rev. B*, 1994, **50**, 17953-17979.
4. G. Kresse and D. Joubert, From ultrasoft pseudopotentials to the projector augmented-wave method, *Phys. Rev. B*, 1999, **59**, 1758-1775.
5. B. Hammer, L. B. Hansen and J. K. Nørskov, Improved adsorption energetics within density-functional theory using revised Perdew-Burke-Ernzerhof functionals, *Phys. Rev. B*, 1999, **59**, 7413-7421.
6. D. J. Chadi, Special points for Brillouin-zone integrations, *Phys. Rev. B*, 1977, **16**, 1746-1747.
7. S. Grimme, Semiempirical GGA-type density functional constructed with a long-range dispersion correction, *J. Comput. Chem.*, 2006, **27**, 1787-1799.
